# Supplementary material
Source: Springer Nature journal article supplement (https://www.springermedizin.de/resource/supplementary/12943_2004_62_MOESM2_ESM.pdf/9553354)

Linkage Distance

13000  
12000  
11000  
10000  
9000  
8000  
7000  
6000  
5000  
4000

ContinB

Bolus3

ContinD

Bolus1

Parental

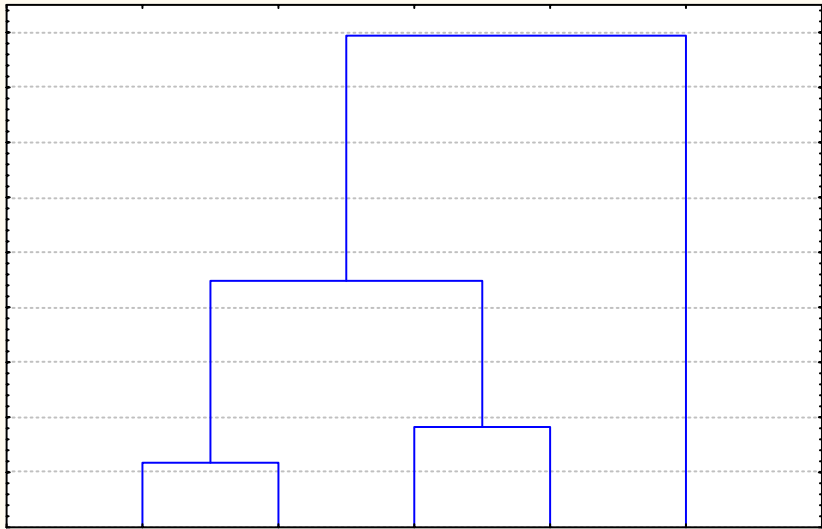

Supplement: MOESM2 [file 9553354]
